# Supplementary material for: Nanovector-mediated exogenous delivery of dsRNA induces silencing of target genes in very young tomato flower buds
Source: Royal Society of Chemistry journal article supplement (doi:10.1039/d2na00478j), 2022-01-01
Supplement: d2na00478j1.pdf [file d2na00478j1.pdf]

**A**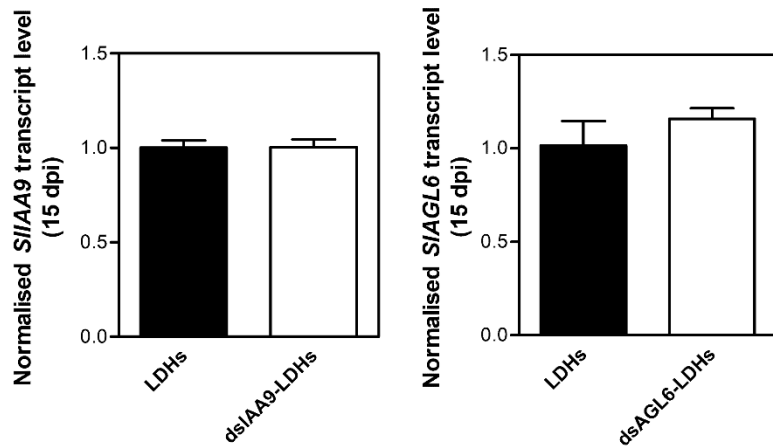**B**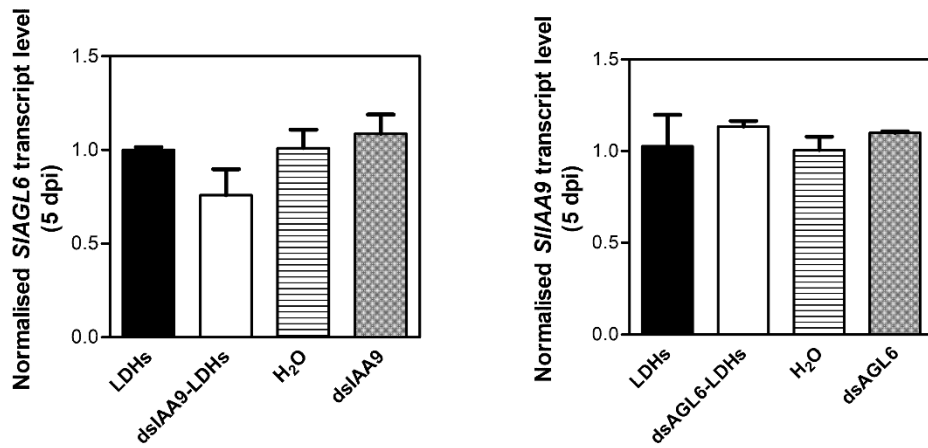

**Supplementary file 2.** Evaluation of *SIIAA9* and *SIAGL6* expression levels. (A) qRT-PCR analyses of *SIIAA9* and *SIAGL6* conducted in ovaries at 15 dpi. (B) Expression level of *SIAGL6* in *dsIAA9* and *dsIAA9*-LDHs treated flower buds at 5 dpi compared to the level in the respective control samples (on the left). Expression level of *SIIAA9* in *dsAGL6* and *dsAGL6*-LDHs treated flower buds at 5 dpi compared to the level in the respective control samples (on the right). Values reported are Means  $\pm$  SE (n=3).

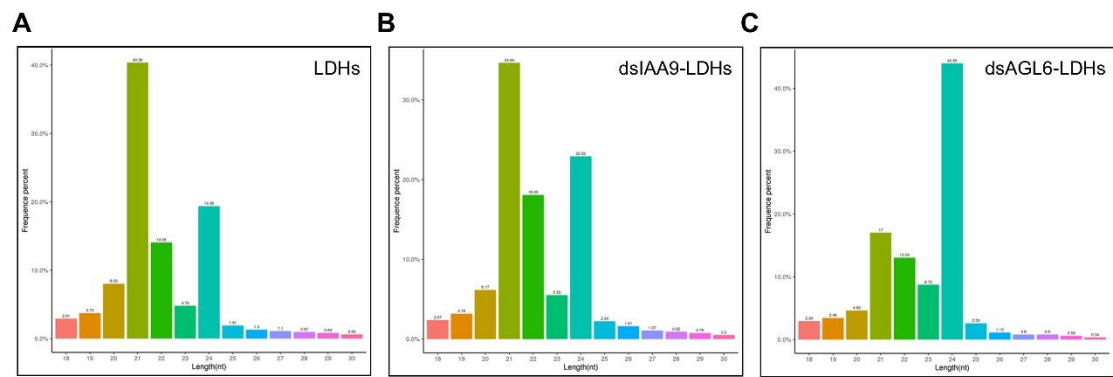

**Supplementary file 3.** Length distribution of total small RNA obtained from small RNA-seq. The abscissa is the length of sRNA reads; the ordinate is the percentage of one length read accounted for total sRNA.

**Supplementary file 4.** Small RNA-Seq Data available at this link [Supplementary file 4](#)
